# Supplementary material for: Diagnostic Value of Neutrophil-to-Lymphocyte, Platelet-to-Lymphocyte, and Monocyte-to-Lymphocyte Ratios for the Assessment of Rheumatoid Arthritis in Patients with Undifferentiated Inflammatory Arthritis
Source: MDPI journal article supplement (doi:10.3390/diagnostics12071702), 2022-07-13
Supplement: s1 [file s1]

**Supplement Table S1.** Baseline clinical characteristics between patients with “clinical rheumatoid arthritis” and “non-clinical rheumatoid arthritis”

|                                           | Clinical RA<br>(n = 65) | Non-clinical RA<br>(n = 136) | <i>p</i> value |
|-------------------------------------------|-------------------------|------------------------------|----------------|
| Age, years, mean ± SD                     | 59.84±14.7              | 58.3±12                      | 0.478          |
| NLR, median, (IQR)                        | 2.34 (1.60-3.84)        | 1.74 (1.29-2.41)             | <0.001         |
| PLR, median, (IQR)                        | 153.58 (110.65-232.15)  | 132.43 (110.05-176.84)       | 0.034          |
| MLR, median, (IQR)                        | 0.28 (0.20-0.42)        | 0.21 (0.16-0.28)             | <0.001         |
| CRP, mg/dL, median, (IQR)                 | 0.48 (0.11-1.49)        | 0.05 (0.03-0.16)             | <0.001         |
| ESR, mm/hr, median, (IQR)                 | 33 (16-60)              | 12 (5-22)                    | <0.001         |
| APR score, median, (IQR)                  | 1 (1-1)                 | 0 (0-1)                      | <0.001         |
| Sx duration, month, median, (IQR)         | 12 (7-24)               | 11 (4-11)                    | 0.003          |
| Sx score, median, (IQR)                   | 1 (1-1)                 | 1 (0-1)                      | 0.058          |
| SJC, n, median, (IQR)                     | 2 (1-3)                 | 1 (1-1)                      | <0.001         |
| TJC, n, median, (IQR)                     | 2 (2-4)                 | 2 (1-4)                      | 0.024          |
| Small joint involvement, median, (IQR)    | 2 (2-4)                 | 1 (1-2)                      | 0.001          |
| Large joint involvement, n, median, (IQR) | 0 (0-1)                 | 0(0-1)                       | 0.886          |
| Joint score, median, (IQR)                | 2 (2-3)                 | 2 (2-2)                      | 0.022          |
| RF, IU/mL, median, (IQR)                  | 42.6 (12.4-112.9)       | 8.5 (7.0-11.7)               | <0.001         |
| RF positivity, n (%)                      | 46 (70.8)               | 23 (16.9)                    | <0.001         |
| Anti-CCP, U/mL, median, (IQR)             | 41.9 (5.56-200.0)       | 0.4 (0.2-0.8)                | <0.001         |
| Anti-CCP positivity, n (%)                | 50 (76.9)               | 5 (3.7)                      | <0.001         |
| Antibody score, median, (IQR)             | 3 (2-3)                 | 0 (0-0)                      | <0.001         |
| Classification score, median, (IQR)       | 7 (6-7)                 | 3 (2-4)                      | <0.001         |

RA rheumatoid arthritis, SD standard deviation, IQR interquartile range, NLR neutrophil-to-lymphocyte ratio, PLR platelet-to-lymphocyte ratio, MLR monocyte-to-lymphocyte ratio, CRP C-reactive protein, ESR erythrocyte sedimentation rate, APR acute-phase response, Sx symptom, SJC swollen joint count, TJC tender joint count, RF rheumatoid factor, CCP cyclic citrullinated protein.

**Supplement Table S2.** Baseline clinical characteristics between patients with “disease modifying anti-rheumatic drugs rheumatoid arthritis” and “non- disease modifying anti-rheumatic drugs rheumatoid arthritis”

|                                           | DMARDs RA<br>(n = 63)  | Non-DMARDs RA<br>(n = 138 ) | <i>p</i> value |
|-------------------------------------------|------------------------|-----------------------------|----------------|
| Age, years, mean ± SD                     | 59.6±14.5              | 58.5±12.1                   | 0.550          |
| NLR, median, (IQR)                        | 2.35 (1.61-3.91)       | 1.75 (1.28-2.40)            | <0.001         |
| PLR, median, (IQR)                        | 153.58 (111.46-232.34) | 132.43 (109.93-178.04)      | 0.023          |
| MLR, median, (IQR)                        | 0.28 (0.20-0.43)       | 0.21 (0.16-0.28)            | <0.001         |
| CRP, mg/dL, median, (IQR)                 | 0.54 (0.12-1.61)       | 0.05 (0.03-0.16)            | <0.001         |
| ESR, mm/hr, median, (IQR)                 | 34 (16-62)             | 12.5 (6-22)                 | <0.001         |
| APR score, median, (IQR)                  | 1 (1-1)                | 0 (0-1)                     | <0.001         |
| Sx duration, month, median, (IQR)         | 12 (6-24)              | 11 (4-12)                   | 0.003          |
| Sx score, median, (IQR)                   | 1 (1-1)                | 1 (0-1)                     | 0.082          |
| SJC, n, median, (IQR)                     | 2 (1-3)                | 1 (1-1)                     | <0.001         |
| TJC, n, median, (IQR)                     | 2 (2-4)                | 2 (1-4)                     | 0.02           |
| Small joint involvement, n, median, (IQR) | 2 (2-4)                | 1 (1-2)                     | 0.001          |
| Large joint involvement, n, median, (IQR) | 0 (0-1)                | 0 (0-1)                     | 0.934          |
| Joint score, median, (IQR)                | 2 (2-3)                | 2 (2-2)                     | 0.036          |
| RF, IU/mL, median, (IQR)                  | 42.6 (12.5-118.7)      | 8.5 (7.0-11.8)              | <0.001         |
| RF positivity, n (%)                      | 45 (71.4)              | 24 (17.4)                   | <0.001         |
| Anti-CCP, U/mL, median, (IQR)             | 41.9 (5.6-200.0)       | 0.4 (0.2-0.8)               | <0.001         |
| Anti-CCP positivity, n (%)                | 49 (77.8)              | 6 (4.3)                     | <0.001         |
| Antibody score, median, (IQR)             | 3 (2-3)                | 0 (0-0)                     | <0.001         |
| Classification score, median, (IQR)       | 7(6-7)                 | 3 (3-4)                     | <0.001         |

DMARDs disease modifying anti-rheumatic drugs, RA rheumatoid arthritis, SD standard deviation, IQR interquartile range, NLR neutrophil-to-lymphocyte ratio, PLR platelet-to-lymphocyte ratio, MLR monocyte-to-lymphocyte ratio, CRP C-reactive protein, ESR erythrocyte sedimentation rate, APR = acute-phase response, Sx symptom, SJC swollen joint count, TJC tender joint count, RF rheumatoid factor, CCP cyclic citrullinated protein.

**Supplement Table S3.** Baseline clinical characteristics between patients with “classified rheumatoid arthritis” and “non-classified rheumatoid arthritis”

|                                           | Classified RA<br>(n = 61) | Non-classified RA<br>(n = 140) | <i>p</i> value |
|-------------------------------------------|---------------------------|--------------------------------|----------------|
| Age, years, mean ± SD                     | 60.2±14.8                 | 58.3±11.9                      | 0.374          |
| NLR, median, (IQR)                        | 2.23 (1.51-3.71)          | 1.83 (1.30-2.52)               | 0.006          |
| PLR, median, (IQR)                        | 153.91 (110.21-232.15)    | 132.82 (110.05-183.9)          | 0.069          |
| MLR, median, (IQR)                        | 0.27 (0.20-0.42)          | 0.22 (0.17-0.28)               | <0.001         |
| CRP, mg/dL, median, (IQR)                 | 0.42 (0.09-1.28)          | 0.05 (0.03-0.23)               | <0.001         |
| ESR, mm/hr, median, (IQR)                 | 33 (18-58)                | 12 (6-22)                      | <0.001         |
| APR score, median, (IQR)                  | 1 (1-1)                   | 0 (0-1)                        | <0.001         |
| Sx duration, month, median, (IQR)         | 12 (7-24)                 | 11 (4-21)                      | 0.006          |
| Sx score, median, (IQR)                   | 1 (1-1)                   | 1 (0-1)                        | 0.023          |
| SJC, n, median, (IQR)                     | 2 (2-3)                   | 1 (1-1)                        | <0.001         |
| TJC, n, median, (IQR)                     | 3 (2-4)                   | 2 (1-4)                        | <0.001         |
| Small joint involvement, n, median, (IQR) | 2 (2-4)                   | 1 (0-2)                        | <0.001         |
| Large joint involvement, n, median, (IQR) | 0 (0-1)                   | 0 (0-1)                        | 0.596          |
| Joint score, median, (IQR)                | 2 (2-3)                   | 2 (2-2)                        | <0.001         |
| RF, IU/mL, median, (IQR)                  | 51.2 (19.8-125.9)         | 8.4 (7.0-10.8)                 | <0.001         |
| RF positivity, n (%)                      | 52 (85.2)                 | 17 (12.1)                      | <0.001         |
| Anti-CCP, U/mL, median, (IQR)             | 48.8 (12.1-200.0)         | 0.4 (0.2-0.8)                  | <0.001         |
| Anti-CCP positivity, n (%)                | 49 (80.3)                 | 6 (4.3)                        | <0.001         |
| Antibody score, median, (IQR)             | 3 (3-3)                   | 0 (0-0)                        | <0.001         |
| Classification score, median, (IQR)       | 7 (6-7)                   | 3 (2-4)                        | <0.001         |

RA rheumatoid arthritis, SD standard deviation, IQR interquartile range, NLR neutrophil-to-lymphocyte ratio, PLR platelet-to-lymphocyte ratio, MLR monocyte-to-lymphocyte ratio, CRP C-reactive protein, ESR erythrocyte sedimentation rate, APR acute-phase response, Sx symptom, SJC swollen joint count, TJC tender joint count, RF rheumatoid factor, CCP cyclic citrullinated protein.
